# Supplementary material for: Integrated Semi-Continuous Manufacturing of Lentiviral Vectors Using a HEK-293 Producer Cell Line
Source: MDPI journal article supplement (doi:10.3390/pr11123347), 2023-12-01
Supplement: s1 [file s1]

Archive with 1 entries (1 files):
- processes-2667847-supplementary.pdf
